# Supplementary material for: Cancer cell targeting, controlled drug release and intracellular fate of biomimetic membrane-encapsulated drug-loaded nano-graphene oxide nanohybrids
Source: Royal Society of Chemistry journal article supplement (doi:10.1039/c8tb00804c), 2018-01-01
Supplement: c8tb00804c1.pdf [file c8tb00804c1.pdf]

## Electronic Supplementary Information

### **Cancer cell targeting, controlled drug release and intracellular fate of biomimetic membrane-encapsulated drug-loaded nano-graphene oxide nanohybrids**

Kun Ma<sup>a,b,§\*</sup>, Duo Fu<sup>a,§</sup>, Yajun Liu<sup>a</sup>, Rui Dai<sup>a</sup>, Dongli Yu<sup>a</sup>, Zhaomin Guo<sup>a</sup>, Changhao Cui<sup>a</sup>, Li Wang<sup>a</sup>,  
Jinqiang Xu<sup>a</sup>, Chuanbin Mao<sup>b,c\*</sup>

<sup>a</sup> School of Life Science and Medicine, Dalian University of Technology, Panjin 124221, China

<sup>b</sup> Department of Chemistry and Biochemistry, University of Oklahoma, OK 73019, USA

<sup>c</sup> School of Materials Science and Engineering, Zhejiang University, Hangzhou, Zhejiang 310027, China.

<sup>§</sup> These authors attribute equally to this works

\*Corresponding author: makunonline@163.com; cbmao@ou.edu

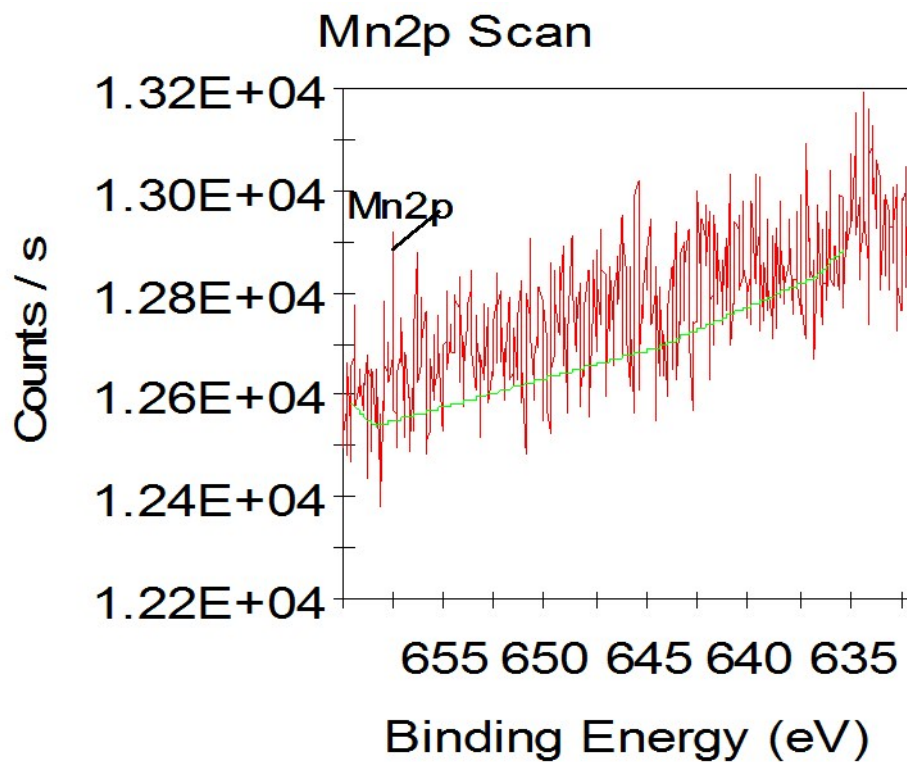

Fig. S1. XPS spectrum of NGO. The intensity of the Mn 2p peak for NGO was negligible, verifying the absence of Mn and thus the high purity of NGO.

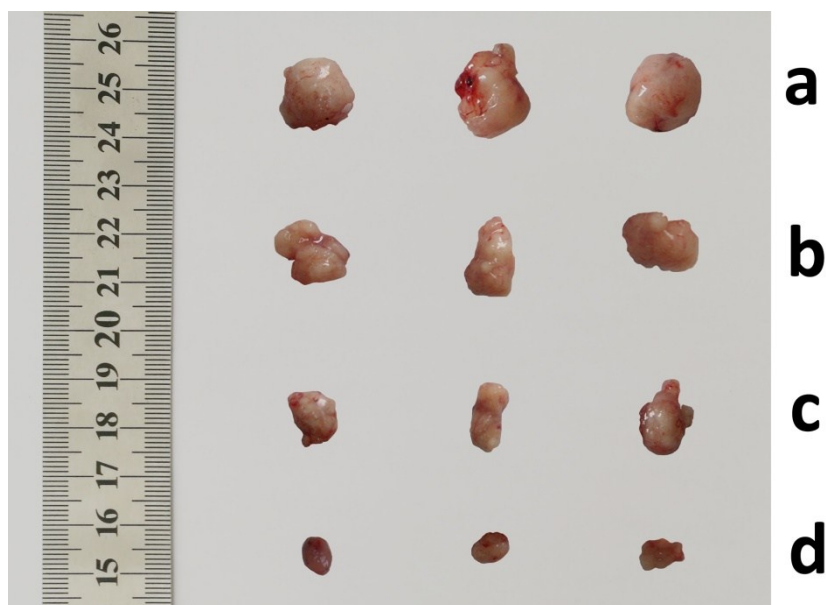

Figure S2. Representative photos of tumor tissues obtained in different groups (a: saline, b: free DOX, c: NGO/DOX@SPC, d: NGO/DOX@SPC-FA) after 14 days of treatment.
